# Supplementary material for: Optical Determination of Lead Chrome Green in Green Tea by Fourier Transform Infrared (FT-IR) Transmission Spectroscopy
Source: PLoS One. 2017 Jan 9;12(1):e0169430. doi: 10.1371/journal.pone.0169430 (PMC5222398; doi:10.1371/journal.pone.0169430)
Supplement: S1 Dataset — The original data of calibration set. (XLSX) [file pone.0169430.s001.xlsx]

## Sheet: Sheet1
19.4248	19.5439	19.6449	19.7283	19.8006	19.8636	19.9177	19.9558	19.9707	19.9545	19.9077	19.8356	19.751	19.6614	19.5764	19.5018	19.4468	19.4134	19.4028	19.4106	19.4319	19.4555	19.4767	19.4945	19.5125	19.532	19.5551	19.5768	19.5948	19.6043	19.6049	19.5944	19.5745	19.5445	19.5083	19.4683	19.4288	19.3925	19.3628	19.3375	19.3153	19.2917	19.2655	19.2334	19.196	19.1515	19.1006	19.0408	18.9723	18.8921
19.4709	19.5756	19.6633	19.733	19.7926	19.8456	19.8937	19.9324	19.9588	19.9689	19.9628	19.9413	19.9091	19.8706	19.8339	19.8024	19.7788	19.7626	19.7547	19.7533	19.7598	19.7718	19.7879	19.8046	19.8211	19.8365	19.8542	19.8739	19.8944	19.9087	19.9124	19.9015	19.8778	19.8442	19.8068	19.7683	19.7328	19.7024	19.6789	19.6597	19.6449	19.6315	19.6183	19.6016	19.5806	19.5531	19.5193	19.4782	19.4299	19.3718
19.174	19.3003	19.4089	19.4997	19.5793	19.6482	19.7082	19.7561	19.7908	19.8075	19.8059	19.7837	19.7472	19.703	19.6613	19.6264	19.6023	19.5864	19.5772	19.5723	19.5743	19.581	19.5914	19.6012	19.6122	19.6244	19.6423	19.6656	19.6906	19.7063	19.7073	19.691	19.6603	19.6182	19.5714	19.5227	19.4763	19.4335	19.399	19.3721	19.3531	19.337	19.3195	19.295	19.2644	19.2268	19.1834	19.1323	19.0728	19.0015
19.1436	19.2645	19.3682	19.4547	19.5309	19.5978	19.6549	19.6981	19.7274	19.7384	19.7322	19.7083	19.672	19.6276	19.5844	19.547	19.5202	19.5021	19.4928	19.4899	19.4929	19.498	19.5041	19.5095	19.5178	19.5294	19.547	19.5674	19.5872	19.5981	19.5959	19.579	19.551	19.5133	19.4685	19.4184	19.37	19.3269	19.2944	19.271	19.2538	19.2368	19.2181	19.1943	19.1661	19.1323	19.0931	19.0444	18.9851	18.9139
18.884	18.996	19.0895	19.165	19.2279	19.2796	19.3201	19.3464	19.3578	19.3477	19.3124	19.2462	19.1491	19.0261	18.892	18.7626	18.653	18.5726	18.5285	18.5222	18.5521	18.6112	18.6921	18.7834	18.8778	18.9653	19.0413	19.1018	19.1463	19.1737	19.1861	19.1858	19.177	19.161	19.1397	19.113	19.0847	19.0572	19.0358	19.0197	19.0087	18.9969	18.9817	18.9616	18.9374	18.9096	18.8789	18.8429	18.7997	18.7461
18.5018	18.6232	18.7237	18.802	18.8652	18.9182	18.9628	18.9954	19.0119	19.0056	18.9729	18.9105	18.822	18.7132	18.5954	18.4791	18.3779	18.302	18.2596	18.252	18.2784	18.3314	18.4025	18.482	18.5641	18.6414	18.7109	18.7675	18.8091	18.8339	18.8453	18.8451	18.837	18.8216	18.8002	18.7723	18.7426	18.7155	18.6957	18.6816	18.6717	18.6604	18.6458	18.6266	18.6046	18.5795	18.5506	18.5148	18.4712	18.4174
19.023	19.145	19.247	19.3302	19.4002	19.4586	19.5073	19.5415	19.5599	19.5608	19.5462	19.5166	19.4761	19.4285	19.3808	19.3361	19.2996	19.2721	19.2525	19.2358	19.2207	19.2044	19.1889	19.1731	19.1594	19.1482	19.1417	19.1386	19.1378	19.1337	19.1234	19.1029	19.0733	19.0357	18.9934	18.9476	18.9017	18.8566	18.8167	18.7826	18.7534	18.726	18.6986	18.6678	18.6337	18.5949	18.5518	18.5006	18.4381	18.3612
18.6661	18.7858	18.8841	18.963	19.0295	19.0859	19.1312	19.1621	19.1792	19.1802	19.1662	19.1381	19.1005	19.0542	19.007	18.9645	18.9313	18.9056	18.8861	18.8689	18.8538	18.8402	18.828	18.8146	18.8016	18.79	18.7835	18.7812	18.782	18.778	18.7647	18.7407	18.7096	18.6734	18.6344	18.5914	18.5464	18.5025	18.4657	18.4362	18.4128	18.3892	18.3635	18.3333	18.3007	18.2655	18.2261	18.1772	18.1162	18.0418
18.9205	19.0213	19.1038	19.1732	19.238	19.2988	19.3503	19.3846	19.3986	19.3921	19.3718	19.3437	19.3124	19.2773	19.2395	19.1998	19.164	19.1367	19.1222	19.1192	19.1235	19.1259	19.1221	19.1112	19.101	19.0981	19.1059	19.1199	19.1314	19.1294	19.1089	19.0705	19.0232	18.9749	18.9294	18.8851	18.8416	18.7988	18.761	18.7316	18.714	18.7045	18.6983	18.6862	18.6624	18.6255	18.5794	18.5271	18.4711	18.4096
18.4205	18.536	18.631	18.7063	18.7722	18.8326	18.888	18.9315	18.9586	18.9648	18.9538	18.929	18.8957	18.8547	18.8124	18.7732	18.744	18.7255	18.7186	18.718	18.7201	18.7206	18.7225	18.7265	18.7355	18.748	18.7641	18.7808	18.7978	18.8088	18.8108	18.7983	18.7715	18.7321	18.6867	18.6396	18.5965	18.5579	18.5254	18.4974	18.4748	18.4547	18.4357	18.4117	18.3817	18.3435	18.2986	18.2474	18.1907	18.1227
18.642	18.7635	18.8677	18.9555	19.0322	19.0984	19.1537	19.1959	19.2256	19.2377	19.2327	19.21	19.1751	19.1332	19.0929	19.0574	19.0332	19.0188	19.0124	19.0097	19.0119	19.0171	19.0253	19.0336	19.0439	19.057	19.0756	19.0971	19.1183	19.1302	19.1302	19.1158	19.0888	19.0503	19.0054	18.9563	18.9089	18.866	18.8326	18.8069	18.7878	18.7701	18.7507	18.7261	18.6979	18.6645	18.6255	18.5777	18.52	18.4499
17.9032	18.0175	18.1099	18.1806	18.2381	18.2866	18.327	18.3554	18.3679	18.3575	18.3211	18.2571	18.1696	18.0627	17.9458	17.8295	17.7282	17.6532	17.6127	17.6071	17.6336	17.684	17.7507	17.8256	17.9044	17.9804	18.0478	18.1007	18.137	18.1566	18.164	18.1625	18.155	18.14	18.1169	18.0861	18.0541	18.0267	18.0082	17.9954	17.9843	17.9698	17.9523	17.9318	17.9103	17.8871	17.8604	17.8243	17.7783	17.7224
19.0449	19.166	19.2651	19.3437	19.4101	19.4674	19.5141	19.5453	19.5622	19.563	19.5493	19.5222	19.4849	19.439	19.391	19.3468	19.312	19.286	19.2677	19.2518	19.2368	19.2228	19.2127	19.2029	19.1922	19.1815	19.1749	19.1718	19.1709	19.1664	19.1541	19.131	19.0999	19.0617	19.0203	18.977	18.9338	18.8915	18.8542	18.8231	18.7973	18.7721	18.7458	18.7157	18.6829	18.6463	18.6053	18.5553	18.4942	18.4191
12.4446	12.5397	12.598	12.6271	12.634	12.6239	12.625	12.6595	12.6956	12.6976	12.6961	12.7262	12.7498	12.7242	12.6803	12.6616	12.6518	12.6206	12.5802	12.5454	12.5024	12.4599	12.4583	12.4939	12.5021	12.4462	12.3824	12.3924	12.462	12.4946	12.4532	12.3968	12.3756	12.3845	12.4004	12.3974	12.356	12.2977	12.2666	12.2636	12.2449	12.2009	12.1791	12.2035	12.2272	12.2039	12.155	12.123	12.1077	12.0887
14.9639	15.0451	15.1132	15.2065	15.3067	15.3293	15.2541	15.1899	15.2322	15.337	15.4147	15.4355	15.3981	15.3334	15.3044	15.3043	15.2753	15.2336	15.2145	15.1844	15.1257	15.0782	15.067	15.0859	15.1143	15.1208	15.1	15.0819	15.0805	15.0827	15.0893	15.1099	15.1326	15.1455	15.1471	15.1101	15.0214	14.9429	14.9279	14.9362	14.9177	14.8889	14.8732	14.8599	14.8489	14.8592	14.8784	14.8681	14.8212	14.7672
12.5496	12.6069	12.6787	12.7351	12.7479	12.7598	12.8086	12.8529	12.8465	12.8232	12.8374	12.8704	12.8702	12.8454	12.8382	12.8383	12.7996	12.7188	12.6402	12.5994	12.5997	12.6227	12.6339	12.607	12.5609	12.5331	12.5289	12.535	12.5406	12.5352	12.5336	12.5613	12.5908	12.5766	12.5434	12.5334	12.517	12.4569	12.3859	12.3434	12.3193	12.3048	12.3059	12.3069	12.2898	12.2624	12.2293	12.1798	12.1241	12.0948
11.6296	11.7351	11.7889	11.8217	11.8679	11.9241	11.9684	12.003	12.0264	12.0084	11.9607	11.9461	11.9707	11.979	11.9555	11.9276	11.9026	11.8664	11.8163	11.7663	11.7286	11.7011	11.6823	11.6772	11.6745	11.6497	11.605	11.568	11.5472	11.5438	11.5794	11.6393	11.6577	11.6217	11.5887	11.5691	11.5199	11.4474	11.4025	11.3872	11.3597	11.3236	11.3175	11.3222	11.2896	11.2419	11.2202	11.1982	11.1466	11.0929
12.9312	12.9955	13.0601	13.134	13.1738	13.1673	13.1744	13.2349	13.2922	13.2759	13.2217	13.2153	13.2509	13.262	13.2383	13.1979	13.1255	13.0297	12.9595	12.9263	12.9038	12.8898	12.8937	12.9062	12.9088	12.8832	12.8336	12.8008	12.8045	12.8134	12.812	12.8183	12.8212	12.7965	12.7621	12.7338	12.6894	12.6288	12.582	12.5486	12.5088	12.4692	12.4443	12.4287	12.4118	12.3955	12.3891	12.3851	12.3531	12.2879
11.9647	12.0769	12.1797	12.2668	12.3252	12.3509	12.3576	12.3659	12.3753	12.3714	12.3633	12.3662	12.3667	12.3471	12.3111	12.2673	12.2252	12.1909	12.1467	12.0758	12.012	11.9993	12.0191	12.0283	12.017	11.9807	11.9207	11.8795	11.8868	11.9034	11.8925	11.8766	11.8806	11.8923	11.8921	11.8676	11.8112	11.7334	11.6607	11.6131	11.5904	11.5817	11.5842	11.5924	11.5776	11.5281	11.4777	11.445	11.4079	11.3557
11.5488	11.5788	11.622	11.6769	11.7036	11.7082	11.7134	11.7138	11.7434	11.8311	11.9068	11.9147	11.8919	11.8558	11.7972	11.7486	11.7111	11.6354	11.5316	11.4594	11.4447	11.48	11.5293	11.5457	11.5351	11.5242	11.4933	11.4509	11.4626	11.5262	11.5598	11.535	11.5022	11.5005	11.514	11.5061	11.4796	11.469	11.4677	11.4369	11.3909	11.3739	11.3686	11.3411	11.3235	11.3394	11.3413	11.2989	11.2388	11.1835
9.92105	9.98286	10.0819	10.171	10.2239	10.237	10.227	10.2234	10.2375	10.253	10.2517	10.2331	10.2035	10.1653	10.1509	10.2009	10.2516	10.1907	10.0703	10.0304	10.0529	10.0512	10.0464	10.0613	10.0521	10.0193	10.0026	10.0067	10.0195	10.0185	9.97815	9.93067	9.94186	10.0114	10.0723	10.0744	10.0213	9.94617	9.88876	9.88166	9.91762	9.94265	9.92338	9.88785	9.8632	9.83578	9.80027	9.77444	9.75776	9.73461
11.5183	11.5895	11.6126	11.6426	11.6847	11.7079	11.7276	11.7668	11.7973	11.8063	11.8318	11.878	11.8995	11.8826	11.8549	11.8211	11.7615	11.6875	11.6422	11.6354	11.6266	11.5873	11.5437	11.5331	11.542	11.5247	11.4811	11.4704	11.5247	11.5872	11.5821	11.5239	11.4973	11.5415	11.607	11.6248	11.5885	11.5473	11.5228	11.4871	11.4328	11.3934	11.3905	11.408	11.4066	11.3597	11.2959	11.2663	11.2655	11.2366
10.5461	10.6341	10.7323	10.7827	10.7737	10.7371	10.7387	10.8244	10.9285	10.9488	10.9133	10.9272	10.9837	10.984	10.915	10.8466	10.7856	10.7041	10.6555	10.6803	10.7033	10.6736	10.6432	10.6239	10.5782	10.5476	10.5713	10.5829	10.5565	10.5631	10.6006	10.6021	10.5969	10.6361	10.6691	10.6554	10.6327	10.611	10.5776	10.5602	10.5564	10.5262	10.4942	10.5046	10.5193	10.4942	10.4624	10.455	10.4374	10.3838
8.55306	8.62707	8.64789	8.62969	8.60601	8.61283	8.65484	8.68971	8.69164	8.69434	8.72334	8.74982	8.74189	8.69912	8.63917	8.59359	8.58543	8.59232	8.57468	8.53586	8.50978	8.50659	8.50136	8.47218	8.4408	8.44872	8.488	8.51389	8.5168	8.51176	8.49884	8.48868	8.5041	8.53592	8.54938	8.52709	8.48274	8.4439	8.42498	8.41825	8.40875	8.39262	8.38331	8.38361	8.37014	8.34691	8.34795	8.34969	8.29825	8.22011
18.9267	19.0891	19.2312	19.3522	19.4579	19.5504	19.6295	19.6902	19.7326	19.7547	19.7564	19.7355	19.6966	19.6453	19.595	19.5549	19.5307	19.5187	19.5179	19.5226	19.5311	19.5403	19.5517	19.5648	19.5821	19.6033	19.6304	19.6602	19.6912	19.7156	19.726	19.7159	19.6877	19.642	19.5851	19.5225	19.4635	19.4131	19.3764	19.3498	19.3309	19.3139	19.2969	19.2751	19.247	19.2101	19.1642	19.1051	19.033	18.9451
18.4759	18.6101	18.7252	18.8218	18.9072	18.9848	19.0545	19.1118	19.1542	19.177	19.181	19.1659	19.1366	19.0987	19.0625	19.033	19.0144	19.0059	19.0055	19.01	19.0198	19.0333	19.0492	19.0644	19.0822	19.1016	19.126	19.1554	19.187	19.2117	19.2224	19.2142	19.1895	19.1518	19.1071	19.0586	19.0126	18.9733	18.9444	18.9233	18.9096	18.8987	18.8875	18.8719	18.8513	18.8248	18.7931	18.7519	18.6986	18.6311
19.4037	19.5126	19.6064	19.6852	19.7546	19.8162	19.8702	19.9126	19.9419	19.9549	19.9532	19.9367	19.9116	19.8813	19.8514	19.8252	19.8074	19.7975	19.7967	19.8016	19.8094	19.8167	19.8238	19.8293	19.8377	19.8508	19.8713	19.8945	19.9158	19.928	19.9296	19.92	19.9026	19.8761	19.8424	19.8031	19.7641	19.7289	19.7028	19.6857	19.6756	19.6662	19.6542	19.6363	19.6149	19.59	19.5616	19.526	19.4813	19.4255
19.2289	19.3396	19.4351	19.5116	19.5744	19.6279	19.6766	19.7179	19.7475	19.7581	19.7478	19.7163	19.6715	19.6221	19.5768	19.54	19.516	19.5017	19.4964	19.4989	19.5101	19.526	19.5426	19.5565	19.57	19.5837	19.6014	19.6227	19.6452	19.6619	19.6696	19.6636	19.6453	19.6161	19.5812	19.5431	19.5061	19.4732	19.4477	19.4276	19.4125	19.3988	19.3853	19.3682	19.3479	19.3221	19.2899	19.2486	19.1992	19.1405
18.2819	18.3996	18.4996	18.5808	18.6506	18.7111	18.764	18.8069	18.8382	18.8514	18.846	18.8216	18.7854	18.742	18.6992	18.6598	18.628	18.6045	18.5924	18.5884	18.5915	18.5979	18.6068	18.6154	18.6272	18.6438	18.6664	18.6906	18.7125	18.7252	18.7263	18.7137	18.6899	18.655	18.6131	18.5671	18.5234	18.485	18.4554	18.4334	18.4167	18.4004	18.3825	18.3594	18.3318	18.2983	18.2596	18.2128	18.1566	18.089
18.7186	18.8386	18.941	19.0229	19.0923	19.1523	19.2054	19.2497	19.2823	19.2944	19.2841	19.2522	19.2087	19.1608	19.1158	19.0753	19.0426	19.0176	19.0043	19.0011	19.0068	19.0161	19.0253	19.0324	19.0418	19.0556	19.0765	19.1003	19.1221	19.1335	19.1319	19.1158	19.0886	19.0502	19.0048	18.9551	18.9075	18.8661	18.8349	18.8119	18.7954	18.7798	18.7618	18.7376	18.7087	18.6751	18.6364	18.5884	18.531	18.4619
18.5771	18.7038	18.809	18.894	18.9655	19.0241	19.071	19.1041	19.1234	19.1261	19.1131	19.0837	19.0429	18.9951	18.9486	18.9074	18.8759	18.8533	18.8393	18.8308	18.8272	18.8257	18.8259	18.8252	18.8247	18.8245	18.8283	18.8345	18.8424	18.8466	18.8442	18.8317	18.8102	18.7808	18.7469	18.7104	18.6753	18.6427	18.615	18.5911	18.5708	18.5501	18.5279	18.5009	18.4692	18.4322	18.391	18.3433	18.2881	18.2218
18.5481	18.6731	18.7757	18.8579	18.9276	18.9862	19.0335	19.066	19.0847	19.0872	19.0743	19.0471	19.008	18.9594	18.9106	18.8673	18.8351	18.8125	18.7975	18.7868	18.7803	18.7747	18.7713	18.7684	18.7668	18.7665	18.7702	18.7768	18.7859	18.792	18.7912	18.7792	18.7566	18.7254	18.6913	18.6558	18.6229	18.5922	18.5648	18.5392	18.5169	18.4963	18.4763	18.4517	18.4205	18.3818	18.3375	18.2883	18.2347	18.1712
19.1492	19.2861	19.3981	19.488	19.5663	19.6358	19.6946	19.7372	19.7625	19.7675	19.7561	19.7303	19.6939	19.6484	19.5997	19.5531	19.5164	19.4918	19.4791	19.472	19.4669	19.4596	19.4513	19.4427	19.4375	19.4353	19.4368	19.4393	19.4414	19.4391	19.4313	19.4152	19.3901	19.3538	19.3102	19.2623	19.2161	19.1745	19.1396	19.1095	19.0838	19.0601	19.0379	19.0131	18.9845	18.9504	18.9102	18.8614	18.8032	18.7309
19.0458	19.1865	19.3011	19.3896	19.463	19.5264	19.5821	19.6253	19.6528	19.6595	19.6489	19.6234	19.5879	19.5448	19.5019	19.4617	19.4282	19.4027	19.3871	19.3777	19.3735	19.369	19.3622	19.3513	19.3416	19.3349	19.3346	19.3387	19.3444	19.3433	19.3334	19.3136	19.2862	19.2519	19.2136	19.17	19.1241	19.0796	19.0435	19.0153	18.9953	18.9777	18.9579	18.9314	18.9013	18.8679	18.8318	18.7889	18.7346	18.6624
18.6903	18.8333	18.9569	19.0605	19.1512	19.2323	19.3046	19.3622	19.4035	19.4247	19.4252	19.4065	19.3748	19.3348	19.2947	19.2602	19.2374	19.2258	19.2256	19.2326	19.2442	19.2558	19.2666	19.2756	19.2879	19.3054	19.3306	19.36	19.3894	19.4112	19.4202	19.4118	19.3887	19.3523	19.307	19.2562	19.2064	19.1623	19.1294	19.1059	19.0906	19.0787	19.0676	19.0521	19.0307	19.0013	18.965	18.9195	18.8642	18.796
19.4034	19.5092	19.6029	19.6834	19.7544	19.8159	19.8679	19.9065	19.9319	19.9431	19.9424	19.929	19.9036	19.8676	19.8303	19.7989	19.78	19.7731	19.7764	19.784	19.7932	19.7997	19.8059	19.8137	19.8263	19.8432	19.8651	19.8864	19.904	19.9139	19.9157	19.9077	19.8916	19.8653	19.8295	19.7858	19.7427	19.7064	19.6816	19.6666	19.6583	19.6488	19.6352	19.6167	19.5961	19.5728	19.5476	19.5146	19.4706	19.4131
18.4196	18.5398	18.6421	18.7255	18.7973	18.8589	18.913	18.9576	18.9898	19.0022	18.9938	18.9652	18.925	18.88	18.8368	18.7979	18.7678	18.7465	18.7363	18.7341	18.7393	18.747	18.7559	18.7636	18.7738	18.7876	18.8077	18.8309	18.8525	18.8645	18.8645	18.8495	18.8227	18.7853	18.7418	18.6953	18.6513	18.6114	18.58	18.5556	18.5373	18.5205	18.5018	18.477	18.4475	18.4123	18.3731	18.326	18.2691	18.1997
18.5626	18.6885	18.7924	18.876	18.9465	19.0052	19.0522	19.085	19.1041	19.1066	19.0937	19.0654	19.0255	18.9772	18.9296	18.8873	18.8555	18.8329	18.8184	18.8088	18.8037	18.8002	18.7986	18.7968	18.7957	18.7955	18.7993	18.8057	18.8142	18.8193	18.8177	18.8054	18.7834	18.7531	18.7191	18.6831	18.6491	18.6175	18.5899	18.5652	18.5439	18.5232	18.5021	18.4763	18.4449	18.407	18.3642	18.3158	18.2614	18.1965
18.7286	18.8633	18.9713	19.0563	19.13	19.1956	19.2505	19.2896	19.313	19.3184	19.3094	19.2867	19.253	19.2103	19.1656	19.1231	19.0895	19.0659	19.0517	19.0409	19.0322	19.0237	19.0156	19.0073	19.0016	18.9984	19.0003	19.0059	19.013	19.0151	19.01	18.994	18.9679	18.9317	18.8897	18.8439	18.7988	18.7573	18.7217	18.6909	18.6666	18.6457	18.6259	18.6027	18.5745	18.54	18.5005	18.454	18.3985	18.3283
9.00371	9.05631	9.10683	9.13549	9.14847	9.14451	9.12539	9.12505	9.15039	9.16415	9.1719	9.20454	9.2278	9.20676	9.18644	9.19463	9.17861	9.10947	9.03419	8.99172	8.97479	8.97619	8.99511	9.01	9.00516	8.99766	8.99612	8.98458	8.96749	8.96434	8.96783	8.96787	8.97942	9.00231	9.00706	8.98618	8.96398	8.94675	8.92075	8.89257	8.8762	8.86063	8.83762	8.82442	8.82507	8.81827	8.80298	8.79769	8.78765	8.73953
15.5442	15.6557	15.7165	15.7561	15.8023	15.8273	15.833	15.8578	15.8892	15.8976	15.9061	15.9476	15.9893	15.9645	15.8823	15.8155	15.7825	15.7547	15.7225	15.6786	15.6332	15.626	15.652	15.677	15.7064	15.7397	15.7447	15.7173	15.6924	15.7105	15.7756	15.8272	15.8139	15.7675	15.736	15.7127	15.6731	15.6224	15.5806	15.5529	15.5441	15.566	15.5873	15.5516	15.4763	15.4266	15.4104	15.3955	15.3819	15.3858
13.9348	13.9585	13.9509	13.9755	14.0845	14.2372	14.343	14.3473	14.2725	14.2219	14.2731	14.375	14.4344	14.4295	14.3863	14.3291	14.2729	14.2358	14.2209	14.1826	14.1021	14.0573	14.0909	14.1428	14.1803	14.2066	14.1926	14.1484	14.137	14.1791	14.2468	14.2989	14.3017	14.2736	14.2546	14.2393	14.2218	14.2131	14.168	14.0539	13.9742	14.0215	14.0919	14.0575	13.9866	13.9949	14.0446	14.036	13.963	13.8922
15.6619	15.8616	15.9564	15.9177	15.8559	15.8572	15.9108	15.9497	15.945	15.9301	15.9437	16.0167	16.1272	16.1634	16.0806	15.9675	15.8806	15.8246	15.8148	15.7982	15.7136	15.6438	15.6885	15.7841	15.803	15.7405	15.7068	15.7533	15.7961	15.7659	15.7235	15.744	15.8018	15.841	15.8469	15.8119	15.7345	15.6537	15.6037	15.5793	15.5789	15.5962	15.5906	15.5473	15.503	15.4759	15.4478	15.4068	15.356	15.3012
13.2005	13.3539	13.4413	13.4544	13.4608	13.5195	13.6007	13.6429	13.6736	13.7457	13.8072	13.801	13.7745	13.7579	13.7189	13.674	13.6445	13.5928	13.5193	13.4724	13.4665	13.4875	13.5002	13.4785	13.4711	13.5112	13.5397	13.5329	13.5328	13.5382	13.5357	13.5441	13.5552	13.5577	13.5699	13.5749	13.5361	13.4789	13.4459	13.4215	13.3833	13.3537	13.3428	13.3205	13.2729	13.2203	13.1911	13.2072	13.2396	13.2174
11.6874	11.7804	11.8623	11.8967	11.922	11.9725	12.03	12.0529	12.0421	12.0537	12.1135	12.1679	12.1668	12.123	12.0679	12.0235	12.0031	11.983	11.9276	11.8585	11.824	11.8248	11.8341	11.8398	11.84	11.8426	11.8552	11.8672	11.8747	11.8901	11.8924	11.848	11.8071	11.852	11.9316	11.9188	11.8301	11.7887	11.8046	11.7928	11.7489	11.725	11.7104	11.6784	11.6521	11.6412	11.6212	11.5957	11.5851	11.5683
14.7208	14.7743	14.7768	14.73	14.7049	14.7684	14.8619	14.9049	14.909	14.9213	14.9667	15.0346	15.0711	15.0231	14.9075	14.801	14.7439	14.7104	14.6888	14.6856	14.6663	14.6233	14.6084	14.6081	14.564	14.5241	14.566	14.6503	14.7085	14.7414	14.7528	14.7341	14.7174	14.7332	14.7461	14.6995	14.6089	14.5502	14.5432	14.5336	14.5146	14.536	14.5823	14.5765	14.499	14.4129	14.3851	14.4086	14.4144	14.3671
14.6942	14.835	15.0581	15.1809	15.1864	15.2027	15.2514	15.2813	15.3232	15.4032	15.468	15.4938	15.5096	15.5203	15.5118	15.4741	15.3843	15.2602	15.1905	15.2077	15.2264	15.1883	15.1343	15.1132	15.1252	15.136	15.1413	15.1921	15.2596	15.2197	15.0997	15.0788	15.1816	15.2595	15.2358	15.1595	15.1027	15.1046	15.1369	15.1318	15.0922	15.0834	15.0938	15.0526	14.9854	14.9751	15.0067	15.0063	14.9558	14.8705
15.2755	15.4177	15.4633	15.4763	15.5618	15.6698	15.6671	15.5607	15.504	15.5881	15.7401	15.8267	15.7988	15.7201	15.6621	15.6233	15.5761	15.5285	15.5083	15.5219	15.5436	15.5382	15.5045	15.485	15.5082	15.5423	15.5392	15.5017	15.475	15.4792	15.4816	15.4659	15.4886	15.5809	15.6591	15.637	15.5447	15.4605	15.4058	15.3565	15.3296	15.3742	15.4431	15.4203	15.3277	15.2986	15.3391	15.3378	15.266	15.1944
18.3102	18.4652	18.596	18.7039	18.7981	18.8832	18.9596	19.0198	19.0591	19.0711	19.0568	19.0195	18.9681	18.9086	18.8504	18.7987	18.7616	18.7416	18.7391	18.7483	18.7663	18.7861	18.8061	18.8239	18.8436	18.8669	18.8968	18.9296	18.9609	18.9826	18.9915	18.9836	18.9602	18.9216	18.8737	18.8195	18.7656	18.7172	18.6791	18.6503	18.6306	18.6132	18.5948	18.5718	18.543	18.5057	18.4611	18.4057	18.339	18.2575
18.8531	18.9681	19.0667	19.148	19.2186	19.2791	19.3293	19.3673	19.3938	19.4027	19.3949	19.3707	19.3356	19.2924	19.2491	19.2106	19.1824	19.1632	19.1522	19.1455	19.1441	19.1464	19.153	19.1603	19.1709	19.1847	19.2035	19.2239	19.2428	19.2534	19.2525	19.2364	19.2066	19.164	19.1157	19.0657	19.0184	18.9748	18.9384	18.9081	18.8842	18.8639	18.8449	18.8211	18.792	18.7554	18.712	18.6601	18.6016	18.5335
18.7384	18.8532	18.9485	19.025	19.0906	19.1488	19.2008	19.2417	19.268	19.2747	19.2636	19.236	19.199	19.1568	19.1157	19.0777	19.0481	19.0278	19.0174	19.0138	19.0159	19.0197	19.0239	19.0268	19.0324	19.0424	19.0593	19.0786	19.0953	19.1018	19.097	19.0791	19.0507	19.0115	18.9651	18.9139	18.8635	18.8178	18.7817	18.7539	18.7324	18.7118	18.689	18.661	18.6297	18.5931	18.5507	18.4994	18.4387	18.3663
18.5445	18.6755	18.784	18.8723	18.9473	19.01	19.0609	19.0958	19.1141	19.1125	19.092	19.0547	19.0046	18.9443	18.8818	18.823	18.7758	18.7417	18.7203	18.7078	18.7043	18.7074	18.7157	18.7254	18.7378	18.7524	18.7705	18.7885	18.8043	18.8128	18.8137	18.8042	18.785	18.7561	18.7222	18.6859	18.6507	18.6191	18.5947	18.5747	18.5579	18.5397	18.5188	18.493	18.4625	18.4259	18.3834	18.3338	18.2771	18.21
18.4499	18.5758	18.6805	18.7643	18.8347	18.8935	18.9429	18.9792	18.9994	19.0002	18.9808	18.9419	18.891	18.8327	18.7731	18.7174	18.6734	18.6418	18.6237	18.6168	18.6206	18.6287	18.6384	18.648	18.6587	18.6707	18.6864	18.7027	18.7167	18.724	18.7237	18.7137	18.6957	18.6697	18.6382	18.6026	18.569	18.5389	18.5145	18.4944	18.4782	18.4617	18.443	18.4199	18.3927	18.3602	18.3221	18.277	18.2244	18.1615
18.183	18.3092	18.4145	18.4975	18.5652	18.6212	18.6692	18.7079	18.735	18.7446	18.7359	18.7097	18.6729	18.6312	18.5911	18.555	18.527	18.506	18.4929	18.4852	18.4827	18.48	18.4744	18.4645	18.455	18.4485	18.4491	18.4534	18.458	18.4577	18.4515	18.4373	18.4164	18.3865	18.3494	18.3068	18.2646	18.2263	18.1962	18.1716	18.1501	18.128	18.1058	18.0823	18.0578	18.0289	17.9931	17.9469	17.89	17.8214
18.8442	18.9679	19.0674	19.145	19.2111	19.2695	19.3201	19.3562	19.3754	19.3751	19.3599	19.3331	19.2983	19.2554	19.2101	19.1669	19.1316	19.1071	19.0958	19.0924	19.0925	19.0887	19.0793	19.0659	19.0566	19.0542	19.0587	19.0637	19.0652	19.0595	19.0486	19.034	19.0162	18.99	18.9545	18.9102	18.8644	18.8239	18.7945	18.774	18.7571	18.7364	18.7108	18.6823	18.6558	18.6298	18.5997	18.5579	18.5018	18.4299
18.5208	18.644	18.7483	18.8321	18.9028	18.9647	19.0204	19.0674	19.1028	19.118	19.1108	19.0835	19.0443	18.9996	18.9577	18.9222	18.8959	18.8769	18.8667	18.8641	18.8694	18.8793	18.8909	18.8995	18.907	18.9171	18.9347	18.9576	18.9824	18.999	19.0013	18.9856	18.9567	18.9182	18.875	18.8289	18.7837	18.7408	18.7046	18.6776	18.6608	18.6486	18.6371	18.619	18.5924	18.557	18.5161	18.4686	18.4137	18.3471
19.0772	19.178	19.263	19.3317	19.39	19.4397	19.4822	19.5138	19.5333	19.5367	19.524	19.4936	19.4493	19.3958	19.3421	19.2943	19.2592	19.2384	19.2327	19.2383	19.2527	19.2718	19.294	19.3171	19.3418	19.367	19.3925	19.416	19.4358	19.4463	19.4478	19.4385	19.4196	19.3907	19.3543	19.3128	19.2724	19.2379	19.2133	19.1965	19.1844	19.1724	19.1577	19.1372	19.1129	19.0849	19.0538	19.0163	18.9697	18.9111
18.4499	18.5635	18.6594	18.7371	18.8031	18.8595	18.9084	18.9473	18.9748	18.9864	18.9808	18.9567	18.9198	18.8744	18.8317	18.7957	18.7695	18.7518	18.7414	18.7349	18.7338	18.7366	18.7434	18.7519	18.7626	18.7745	18.7894	18.8059	18.8239	18.8364	18.8386	18.8253	18.7971	18.7558	18.7089	18.6607	18.6166	18.5771	18.5445	18.516	18.4919	18.4699	18.4493	18.4255	18.3962	18.3588	18.3142	18.2615	18.2022	18.134
18.5409	18.6679	18.7742	18.8603	18.9328	18.9943	19.0447	19.0802	19.0992	19.0968	19.0749	19.0349	18.9818	18.9207	18.8592	18.8023	18.7569	18.7244	18.7068	18.7004	18.7037	18.7127	18.7245	18.7356	18.7475	18.7598	18.7748	18.7911	18.8059	18.8129	18.8113	18.8005	18.7824	18.7564	18.7254	18.6904	18.6557	18.6241	18.5992	18.5789	18.5618	18.5441	18.5242	18.499	18.4701	18.4366	18.3985	18.3529	18.299	18.2343
18.4817	18.6072	18.7113	18.7935	18.862	18.9193	18.9673	19.0036	19.0276	19.0349	19.0255	19.0003	18.9652	18.9229	18.8795	18.8398	18.8089	18.7871	18.775	18.7671	18.7619	18.7555	18.7472	18.7364	18.7279	18.723	18.7234	18.7264	18.7295	18.7274	18.7196	18.7051	18.6843	18.6546	18.6179	18.5754	18.5333	18.4961	18.4675	18.4442	18.4239	18.4029	18.3812	18.357	18.3322	18.3042	18.2702	18.2259	18.1712	18.104
7.768	7.83524	7.85368	7.87434	7.92191	7.9497	7.94777	7.95879	7.98927	8.00492	7.99144	7.97849	8.00524	8.05482	8.06334	8.01123	7.93701	7.86585	7.80295	7.77496	7.80277	7.85268	7.86831	7.8323	7.77487	7.74689	7.77621	7.83759	7.88506	7.89135	7.84956	7.79124	7.77489	7.80556	7.83266	7.84034	7.8485	7.84929	7.82309	7.77676	7.7301	7.69927	7.69356	7.70667	7.71518	7.70033	7.67634	7.66947	7.66568	7.6324
8.78764	8.85166	8.90477	8.92538	8.91657	8.92052	8.94366	8.95545	8.94198	8.91258	8.89895	8.92702	8.96244	8.95061	8.90105	8.86514	8.86125	8.85633	8.80931	8.73674	8.70751	8.74852	8.80726	8.82853	8.81016	8.77729	8.74461	8.71304	8.69579	8.72618	8.8039	8.86006	8.8409	8.78926	8.76916	8.76493	8.73599	8.70281	8.70104	8.71444	8.70751	8.67972	8.65486	8.64114	8.62459	8.59477	8.56392	8.5552	8.56249	8.54277
15.2079	15.3019	15.3526	15.3945	15.4487	15.4906	15.5258	15.5734	15.5981	15.573	15.5508	15.5901	15.6642	15.6966	15.6612	15.6058	15.5695	15.5304	15.4669	15.4232	15.4531	15.5257	15.5639	15.5587	15.5577	15.5617	15.5342	15.4855	15.4631	15.4833	15.5247	15.5613	15.5723	15.5509	15.5173	15.4949	15.4774	15.4537	15.4323	15.4108	15.3721	15.329	15.3164	15.3421	15.3744	15.3699	15.322	15.2738	15.2479	15.2174
12.6164	12.7221	12.7829	12.7928	12.8103	12.8372	12.8186	12.7602	12.7287	12.7597	12.8432	12.9316	12.9441	12.8605	12.7698	12.7381	12.7241	12.6914	12.675	12.6913	12.7003	12.6736	12.6189	12.5655	12.5591	12.6103	12.6627	12.6684	12.6396	12.5974	12.5579	12.5656	12.6349	12.6902	12.6639	12.5912	12.5283	12.4887	12.4885	12.5185	12.5264	12.516	12.5291	12.5346	12.4958	12.4602	12.459	12.4468	12.4067	12.3808
12.9149	12.9277	12.9255	12.9645	13.0512	13.1427	13.1995	13.1929	13.1628	13.2048	13.2978	13.3219	13.2606	13.1791	13.1069	13.0766	13.1116	13.149	13.1109	13.0232	12.9751	12.9753	12.9479	12.8942	12.8928	12.9344	12.9639	13.0059	13.0683	13.0902	13.0756	13.0873	13.1145	13.1124	13.0996	13.0885	13.0254	12.9168	12.8673	12.8976	12.9052	12.8597	12.8358	12.8538	12.8636	12.8544	12.8536	12.8497	12.809	12.7434
12.949	13.0451	13.1159	13.151	13.1962	13.2609	13.2833	13.2368	13.2212	13.3056	13.3903	13.3923	13.3666	13.3282	13.2323	13.1428	13.1447	13.1746	13.1393	13.0604	12.9987	12.9751	12.9927	13.0445	13.1027	13.135	13.1232	13.0768	13.0338	13.0304	13.0576	13.0751	13.0728	13.0685	13.0588	13.034	13.0011	12.9608	12.9173	12.899	12.9141	12.9217	12.8831	12.8183	12.7855	12.807	12.8343	12.8014	12.7118	12.6401
10.9771	11.0909	11.1311	11.1141	11.1073	11.1705	11.2516	11.2548	11.2217	11.2504	11.3169	11.3604	11.3746	11.3447	11.281	11.228	11.1581	11.0544	10.9985	11.0114	11.0277	11.0319	11.013	10.9571	10.9443	11.0188	11.0796	11.0601	11.0073	10.9655	10.9577	10.9965	11.0432	11.0552	11.0432	11.0223	10.9762	10.9131	10.88	10.8891	10.9071	10.9159	10.907	10.8767	10.8627	10.8825	10.8892	10.8633	10.8265	10.7783
10.6897	10.7293	10.7743	10.8544	10.948	10.9934	10.969	10.9154	10.9073	10.9846	11.0877	11.1297	11.0997	11.0297	10.9496	10.8973	10.8832	10.8697	10.8187	10.7331	10.658	10.636	10.6534	10.6773	10.7087	10.7391	10.7361	10.7074	10.6884	10.6769	10.6627	10.6753	10.7246	10.7598	10.746	10.7012	10.6453	10.5939	10.5645	10.5463	10.5399	10.572	10.6063	10.579	10.5199	10.4841	10.4571	10.4241	10.406	10.3983
11.2428	11.265	11.2744	11.2944	11.3074	11.2906	11.2656	11.2738	11.3221	11.3677	11.3692	11.3428	11.3314	11.3433	11.3544	11.3317	11.2496	11.1389	11.0873	11.1215	11.1539	11.1199	11.0679	11.0557	11.0675	11.0637	11.0449	11.0528	11.1024	11.141	11.1373	11.1403	11.176	11.1913	11.1575	11.1171	11.095	11.0692	11.0315	10.9906	10.9573	10.9585	10.9889	11	10.9934	10.9992	10.9827	10.9293	10.9017	10.915
12.3136	12.3098	12.2954	12.3567	12.4555	12.5003	12.4646	12.3912	12.353	12.3769	12.4003	12.3882	12.4001	12.4382	12.4047	12.2833	12.1734	12.1327	12.1177	12.0673	11.9942	11.9748	12.0342	12.1064	12.1285	12.0934	12.0384	12.0313	12.0916	12.1355	12.0886	12.0009	11.9771	12.0386	12.0958	12.0639	11.974	11.9158	11.9064	11.8954	11.8676	11.8572	11.8724	11.8786	11.8551	11.8166	11.7849	11.7714	11.7666	11.7496
13.1787	13.2955	13.3639	13.3848	13.3641	13.3564	13.4138	13.4823	13.4969	13.5018	13.5547	13.6089	13.5905	13.5208	13.4705	13.4472	13.4084	13.3413	13.2682	13.2094	13.1886	13.2163	13.2516	13.2511	13.2309	13.2208	13.2388	13.3004	13.3605	13.3459	13.288	13.2772	13.3236	13.3792	13.407	13.3811	13.3091	13.2412	13.2133	13.2122	13.2074	13.1852	13.1461	13.1015	13.0773	13.0903	13.1206	13.1262	13.0855	13.0126
11.2152	11.2609	11.2482	11.2566	11.3083	11.3524	11.3415	11.2706	11.2005	11.2138	11.307	11.3786	11.3576	11.2907	11.2434	11.1839	11.0871	11.0312	11.0423	11.0214	10.9372	10.8953	10.9612	11.0595	11.0808	11.0243	10.9798	10.9961	11.0417	11.0701	11.0691	11.0519	11.0183	10.9712	10.9558	10.979	10.9682	10.914	10.8854	10.884	10.8779	10.8981	10.947	10.9632	10.935	10.9053	10.8833	10.8534	10.8265	10.8202
19.0217	19.1559	19.2708	19.3679	19.4544	19.5303	19.5947	19.6436	19.6768	19.69	19.6817	19.6525	19.6083	19.5547	19.5015	19.4547	19.4206	19.398	19.3861	19.3801	19.3808	19.3869	19.3972	19.4068	19.4165	19.427	19.4407	19.4566	19.473	19.4816	19.478	19.458	19.4231	19.3761	19.3234	19.268	19.2144	19.1649	19.1226	19.0871	19.0581	19.0311	19.0037	18.9699	18.9292	18.8807	18.8254	18.7621	18.6894	18.604
18.5381	18.6572	18.7569	18.8388	18.9104	18.9723	19.0244	19.0621	19.0851	19.0886	19.0722	19.0354	18.9849	18.9261	18.8692	18.8189	18.7813	18.756	18.7422	18.7364	18.7389	18.746	18.7565	18.7661	18.7765	18.7887	18.805	18.8222	18.8378	18.8435	18.8372	18.8161	18.7817	18.7365	18.6858	18.6311	18.5782	18.5305	18.4922	18.4609	18.4352	18.4103	18.3833	18.3509	18.3145	18.2726	18.2243	18.1668	18.0998	18.0201
18.7519	18.8759	18.9795	19.0636	19.1363	19.1996	19.2539	19.2943	19.3193	19.3229	19.3055	19.2669	19.2141	19.153	19.0943	19.0415	19.0016	18.9755	18.9625	18.9582	18.9626	18.9716	18.9839	18.9955	19.0082	19.0209	19.0378	19.0562	19.0721	19.0783	19.0725	19.0525	19.0203	18.9764	18.9259	18.8721	18.8212	18.7759	18.7393	18.7091	18.6842	18.6601	18.6342	18.6032	18.5672	18.5251	18.4764	18.4177	18.3492	18.2679
18.7139	18.8223	18.913	18.9859	19.0477	19.1004	19.1458	19.179	19.1961	19.1888	19.1556	19.1006	19.036	18.9682	18.9052	18.85	18.8089	18.7833	18.7751	18.7816	18.7994	18.8204	18.8408	18.8566	18.8719	18.889	18.9112	18.9344	18.9547	18.965	18.9655	18.9559	18.9375	18.9086	18.8718	18.8292	18.7872	18.7484	18.7166	18.69	18.6669	18.6419	18.6141	18.5824	18.548	18.5091	18.4646	18.411	18.3482	18.2744
18.7626	18.8703	18.9604	19.0338	19.0986	19.1558	19.2055	19.2436	19.2688	19.2756	19.2641	19.2356	19.1949	19.1468	19.1002	19.0592	19.0296	19.0115	19.005	19.0059	19.0136	19.0252	19.0392	19.0522	19.0665	19.0826	19.102	19.1224	19.1418	19.1529	19.1523	19.1372	19.1098	19.0719	19.0288	18.9827	18.9384	18.8984	18.8662	18.8395	18.8181	18.7981	18.777	18.7509	18.7204	18.6847	18.645	18.5985	18.5429	18.4748
18.701	18.8304	18.9381	19.0249	19.0974	19.1581	19.207	19.2412	19.2613	19.2636	19.2485	19.2159	19.172	19.1215	19.0718	19.0276	18.994	18.9701	18.9559	18.9488	18.9484	18.9511	18.9553	18.9573	18.9591	18.9625	18.9708	18.9823	18.9936	18.9982	18.9948	18.9818	18.9614	18.9341	18.9021	18.866	18.831	18.7999	18.7753	18.7549	18.7374	18.719	18.6985	18.6731	18.6437	18.6094	18.5701	18.5241	18.471	18.4083
18.7784	18.9393	19.0739	19.1831	19.2765	19.3565	19.4225	19.4717	19.504	19.5134	19.4994	19.4627	19.409	19.3443	19.2785	19.2185	19.1715	19.1377	19.1175	19.1072	19.105	19.1067	19.1098	19.1108	19.1128	19.1166	19.1247	19.1345	19.1437	19.1463	19.1399	19.1205	19.0894	19.0473	18.9988	18.9461	18.8936	18.8436	18.8003	18.7639	18.735	18.7089	18.6825	18.6522	18.6178	18.5783	18.5339	18.4802	18.4142	18.3298
18.3856	18.5461	18.6785	18.7836	18.8728	18.9492	19.0133	19.0608	19.0911	19.0992	19.0855	19.0504	19.0007	18.9403	18.8776	18.8188	18.773	18.7416	18.7245	18.7152	18.7134	18.715	18.7173	18.7168	18.7161	18.7167	18.7232	18.7322	18.7401	18.7413	18.7346	18.7161	18.6864	18.646	18.6002	18.5496	18.499	18.4513	18.4119	18.3802	18.3553	18.3318	18.3078	18.2801	18.2486	18.2112	18.1689	18.1177	18.0546	17.9746
18.9573	19.0852	19.196	19.2894	19.371	19.4407	19.5013	19.5509	19.5873	19.6041	19.5995	19.5729	19.5325	19.484	19.4358	19.3932	19.3607	19.3378	19.3252	19.3213	19.3272	19.3385	19.3515	19.3616	19.3709	19.3823	19.3992	19.4187	19.4364	19.4433	19.4361	19.4135	19.3798	19.3373	19.2892	19.2365	19.1844	19.1365	19.0982	19.0688	19.046	19.024	18.9987	18.9658	18.9273	18.8837	18.8361	18.7797	18.7119	18.6302
18.652	18.7761	18.8799	18.9642	19.0373	19.1006	19.1545	19.1939	19.2175	19.2189	19.197	19.1514	19.0906	19.0222	18.9558	18.8962	18.8512	18.8215	18.8073	18.8044	18.8127	18.827	18.8452	18.8612	18.8762	18.8909	18.9088	18.9272	18.9428	18.9485	18.9429	18.9231	18.8911	18.8479	18.7983	18.7444	18.6928	18.6464	18.6089	18.5775	18.5514	18.5253	18.4973	18.464	18.4269	18.3829	18.3325	18.2732	18.2041	18.1224
18.998	19.1028	19.1896	19.2619	19.3269	19.3848	19.4335	19.4682	19.4892	19.4941	19.4842	19.4578	19.4179	19.3684	19.318	19.2743	19.2457	19.2315	19.2276	19.2279	19.2329	19.2423	19.257	19.2733	19.2896	19.3032	19.3169	19.3314	19.3468	19.3581	19.3604	19.3466	19.3174	19.2765	19.2321	19.1874	19.1456	19.1068	19.0733	19.0452	19.0233	19.0039	18.9849	18.9613	18.9317	18.8945	18.8525	18.8051	18.7509	18.6853
18.6155	18.7438	18.8498	18.9345	19.0054	19.0645	19.1135	19.1499	19.173	19.1783	19.1658	19.1355	19.0935	19.0445	18.9964	18.9529	18.9183	18.8937	18.8797	18.8725	18.8718	18.8746	18.8786	18.8798	18.8807	18.8837	18.8928	18.9053	18.9176	18.9222	18.9179	18.9045	18.8843	18.8568	18.8246	18.7882	18.7517	18.7187	18.6936	18.6743	18.6582	18.6405	18.6193	18.5935	18.565	18.5321	18.4947	18.4492	18.3955	18.3316
18.5106	18.6724	18.8072	18.9161	19.0085	19.0872	19.1534	19.2024	19.233	19.2412	19.2278	19.193	19.1421	19.0802	19.017	18.9583	18.9123	18.8792	18.8588	18.8474	18.8449	18.8463	18.8493	18.8498	18.8504	18.8526	18.8605	18.8707	18.8805	18.8833	18.8777	18.8599	18.8312	18.792	18.7463	18.6951	18.6433	18.5943	18.5531	18.5194	18.4934	18.4694	18.4454	18.4176	18.3862	18.3489	18.3061	18.2535	18.1887	18.1065
14.9503	14.9774	15.0053	15.0593	15.0861	15.0894	15.1283	15.1873	15.1984	15.1675	15.1546	15.172	15.1931	15.214	15.236	15.2204	15.1408	15.0561	15.0314	15.0397	15.0318	15.0126	14.9993	14.9942	14.9902	14.9681	14.9385	14.942	14.9618	14.9407	14.8887	14.8685	14.9035	14.9562	14.9686	14.9213	14.8517	14.7993	14.7692	14.7502	14.7268	14.6925	14.6697	14.6774	14.6919	14.6806	14.647	14.6102	14.5723	14.5365
15.8436	15.8773	15.8999	15.9194	15.9217	15.895	15.8482	15.8081	15.7884	15.7831	15.7916	15.8042	15.7917	15.7423	15.6764	15.6156	15.5555	15.4815	15.4011	15.3276	15.2699	15.2653	15.3227	15.3572	15.3026	15.2068	15.1425	15.1293	15.1323	15.087	15.0004	14.971	15.0233	15.0583	15.0235	14.9653	14.9114	14.8496	14.7923	14.7581	14.7363	14.714	14.6876	14.6478	14.5933	14.5397	14.4993	14.4681	14.4298	14.3767
18.9629	18.938	18.9559	19.0247	19.056	19.0123	18.9697	18.9659	18.9565	18.9483	18.9742	18.9873	18.9482	18.8905	18.8295	18.749	18.6672	18.6087	18.5563	18.4867	18.4174	18.3826	18.374	18.3604	18.3399	18.3109	18.2577	18.2041	18.1769	18.1445	18.0941	18.0688	18.0724	18.0662	18.0501	18.0317	17.9812	17.887	17.7837	17.7037	17.6575	17.6403	17.6317	17.6179	17.5988	17.5646	17.5087	17.4476	17.3956	17.3532
18.4941	18.4931	18.4931	18.5198	18.5554	18.5663	18.5444	18.5125	18.4864	18.4654	18.4547	18.446	18.4113	18.3529	18.302	18.2615	18.2094	18.1422	18.0742	18.0157	17.9631	17.9076	17.8621	17.8482	17.8461	17.8174	17.7716	17.7402	17.7095	17.6578	17.6209	17.6292	17.6352	17.5979	17.5584	17.544	17.5065	17.419	17.3253	17.2646	17.2292	17.2029	17.1863	17.1796	17.166	17.1275	17.0676	17.0046	16.9495	16.9032
17.1761	17.2036	17.2509	17.291	17.2808	17.2503	17.276	17.3352	17.3195	17.2334	17.191	17.2143	17.2278	17.2005	17.1556	17.1011	17.0167	16.9017	16.8104	16.7895	16.8016	16.778	16.7175	16.6767	16.6774	16.6708	16.6198	16.5641	16.5491	16.5472	16.5116	16.4527	16.4106	16.397	16.3932	16.3753	16.3279	16.2466	16.1423	16.0459	15.9891	15.9764	15.9882	16.0004	15.9868	15.9355	15.8674	15.8115	15.7688	15.7238
15.8023	15.8387	15.8766	15.8995	15.8702	15.8028	15.7665	15.7848	15.7902	15.7314	15.6472	15.5984	15.5992	15.6092	15.5753	15.508	15.4591	15.4242	15.3605	15.2676	15.1879	15.1629	15.1881	15.2054	15.1697	15.0957	15.0291	15.0048	15.0063	14.9837	14.9407	14.9247	14.9256	14.8951	14.8406	14.7987	14.7609	14.6988	14.6267	14.5783	14.553	14.5321	14.5145	14.496	14.4541	14.3919	14.3472	14.3322	14.3152	14.2771
18.4928	18.5527	18.5422	18.5209	18.532	18.5562	18.562	18.5543	18.5504	18.5541	18.5645	18.564	18.5249	18.4614	18.4119	18.3658	18.2947	18.2148	18.1446	18.0699	17.9827	17.9052	17.8768	17.9068	17.9308	17.8866	17.8176	17.7993	17.8112	17.783	17.7249	17.7074	17.7244	17.6991	17.6379	17.6079	17.5737	17.4686	17.3544	17.3084	17.2893	17.2538	17.2274	17.2096	17.1665	17.1082	17.0663	17.029	16.9605	16.8641
20.5404	20.5391	20.5655	20.6293	20.6555	20.6263	20.5938	20.6002	20.6396	20.6571	20.6201	20.5748	20.5623	20.551	20.4964	20.3908	20.2678	20.178	20.1159	20.0418	19.9896	19.9975	19.9988	19.949	19.9127	19.9131	19.8964	19.8595	19.8348	19.8131	19.7835	19.7621	19.7534	19.7399	19.7063	19.6538	19.5862	19.4972	19.3987	19.3266	19.2891	19.2615	19.233	19.2084	19.1781	19.1307	19.0833	19.0571	19.0289	18.9651
17.7911	17.8269	17.8459	17.8945	17.9617	18.0006	17.9915	17.9496	17.9016	17.8758	17.8856	17.9074	17.9021	17.8617	17.8092	17.7577	17.6995	17.6288	17.5558	17.4938	17.4477	17.4174	17.3925	17.3567	17.3147	17.2826	17.2526	17.2135	17.1747	17.1451	17.1342	17.1544	17.1857	17.1881	17.149	17.0747	16.9829	16.915	16.8853	16.8497	16.7752	16.6884	16.6297	16.5983	16.5602	16.5146	16.5081	16.5334	16.5124	16.4306
18.1756	18.1716	18.1481	18.1675	18.1808	18.1425	18.0882	18.0536	18.027	17.9945	17.9682	17.9535	17.9307	17.8848	17.8272	17.7688	17.7025	17.6287	17.5589	17.4877	17.4093	17.3524	17.3426	17.3569	17.3556	17.3205	17.2584	17.2024	17.1734	17.1486	17.121	17.1196	17.1287	17.0979	17.0282	16.9514	16.8733	16.7893	16.7079	16.6473	16.6172	16.6006	16.5823	16.5719	16.566	16.5445	16.5119	16.473	16.4069	16.3208
17.6299	17.6859	17.7518	17.8257	17.8378	17.7708	17.7083	17.7171	17.7705	17.8034	17.7801	17.7131	17.6522	17.6334	17.6306	17.5914	17.5132	17.4308	17.3399	17.223	17.1323	17.1219	17.1487	17.1495	17.1213	17.0722	17.0192	17.005	17.012	16.9708	16.9007	16.8855	16.9212	16.9331	16.8937	16.8241	16.7443	16.6771	16.6401	16.6163	16.5749	16.5144	16.4628	16.4421	16.437	16.4104	16.3565	16.3037	16.2568	16.1969
19.1692	19.2911	19.3935	19.4782	19.552	19.6166	19.6727	19.716	19.7445	19.7534	19.7424	19.7117	19.6663	19.6103	19.5534	19.5019	19.4651	19.4425	19.4324	19.4324	19.4411	19.4539	19.4704	19.4872	19.5054	19.5238	19.5451	19.5669	19.5861	19.5957	19.594	19.577	19.5466	19.5039	19.454	19.4008	19.3509	19.3068	19.272	19.2437	19.2214	19.2012	19.1801	19.1532	19.1212	19.083	19.039	18.9862	18.9238	18.8485
18.6486	18.764	18.8633	18.9445	19.0144	19.0754	19.1286	19.1706	19.2004	19.2124	19.2062	19.181	19.1424	19.0966	19.0522	19.0128	18.984	18.9661	18.9596	18.962	18.9725	18.9864	19.0027	19.0174	19.0327	19.0497	19.0713	19.0954	19.1173	19.1288	19.1286	19.1153	19.0909	19.0567	19.0157	18.9696	18.9245	18.884	18.8536	18.832	18.8167	18.8014	18.7837	18.7609	18.7346	18.7037	18.6675	18.6229	18.5684	18.502
18.7716	18.8874	18.985	19.0647	19.1335	19.193	19.2449	19.2856	19.3131	19.3225	19.313	19.2837	19.2413	19.1918	19.143	19.0986	19.0651	19.0441	19.0348	19.0337	19.0412	19.0532	19.0693	19.0857	19.1025	19.119	19.1396	19.1617	19.1818	19.1925	19.1919	19.1775	19.1513	19.1147	19.0723	19.0261	18.9819	18.9431	18.9127	18.8894	18.8731	18.8578	18.8401	18.8166	18.7887	18.7553	18.7173	18.6715	18.6159	18.5487
18.7578	18.8686	18.9608	19.0334	19.0953	19.1511	19.2013	19.2406	19.2655	19.2723	19.2612	19.2306	19.1874	19.1367	19.086	19.0408	19.0071	18.9845	18.9747	18.9736	18.9799	18.9904	19.0035	19.0154	19.0267	19.0368	19.052	19.0706	19.0894	19.1001	19.098	19.0821	19.0559	19.0198	18.9786	18.9339	18.889	18.8468	18.813	18.7877	18.7701	18.7539	18.7348	18.7087	18.6773	18.642	18.6043	18.5586	18.5023	18.4333
18.6985	18.8018	18.8883	18.9585	19.0191	19.0721	19.117	19.15	19.171	19.1756	19.164	19.1351	19.0919	19.0397	18.9884	18.9437	18.9108	18.8882	18.875	18.8676	18.8666	18.8717	18.8819	18.8916	18.901	18.9097	18.9211	18.9359	18.9522	18.9611	18.9583	18.9413	18.9136	18.8769	18.8359	18.7922	18.7495	18.7101	18.6783	18.6537	18.635	18.6163	18.5947	18.5672	18.5358	18.5002	18.4601	18.4115	18.3534	18.2842
18.0511	18.1572	18.242	18.3086	18.3661	18.417	18.4593	18.4884	18.5036	18.5025	18.4886	18.4631	18.4286	18.3876	18.3453	18.3055	18.2752	18.2565	18.2493	18.2486	18.251	18.2535	18.2566	18.2588	18.2631	18.2691	18.2774	18.2858	18.2935	18.2973	18.2962	18.2879	18.2725	18.2494	18.2213	18.1899	18.1596	18.1328	18.1116	18.0936	18.0776	18.06	18.0412	18.0193	17.9944	17.965	17.9313	17.8916	17.8449	17.789
18.7991	18.9114	19.0019	19.0731	19.1336	19.1864	19.2311	19.2636	19.2824	19.2842	19.2709	19.2436	19.2064	19.1613	19.1155	19.0745	19.0437	19.0242	19.0152	19.012	19.0136	19.017	19.0215	19.0248	19.028	19.0324	19.0407	19.0506	19.0607	19.0668	19.0668	19.0578	19.0405	19.0149	18.9846	18.9521	18.9209	18.8927	18.8699	18.8512	18.8357	18.8198	18.802	18.7799	18.754	18.7229	18.6869	18.6442	18.595	18.5375
18.9492	19.0594	19.1477	19.2153	19.2715	19.3188	19.3586	19.3876	19.4037	19.402	19.3828	19.3493	19.3076	19.2598	19.2107	19.1643	19.1252	19.0946	19.075	19.0629	19.0561	19.0504	19.0448	19.0366	19.028	19.0218	19.02	19.0189	19.0154	19.0065	18.9913	18.9681	18.9393	18.9036	18.8628	18.8192	18.7775	18.7392	18.7073	18.6804	18.6569	18.6327	18.6069	18.5789	18.5484	18.5133	18.4723	18.4228	18.3644	18.2952
18.4797	18.6101	18.7183	18.8055	18.8813	18.9494	19.01	19.0573	19.0864	19.0905	19.0708	19.0291	18.9749	18.9139	18.8527	18.7969	18.7544	18.7273	18.717	18.7195	18.7333	18.7516	18.7705	18.7857	18.8	18.8167	18.8399	18.8658	18.8891	18.9015	18.9002	18.8839	18.8556	18.8162	18.7691	18.7159	18.6628	18.6148	18.577	18.5488	18.5281	18.5088	18.488	18.4619	18.4303	18.3917	18.3465	18.292	18.2263	18.147
18.7547	18.8705	18.969	19.0494	19.1182	19.178	19.2294	19.2687	19.2949	19.3029	19.2912	19.2612	19.2182	19.1668	19.1164	19.0729	19.0421	19.0236	19.0176	19.0209	19.0323	19.0479	19.0664	19.0834	19.0997	19.1163	19.1357	19.1567	19.177	19.1889	19.1903	19.1781	19.1545	19.1204	19.0798	19.035	18.9916	18.9532	18.9237	18.902	18.8867	18.872	18.8551	18.833	18.8074	18.7756	18.7383	18.6929	18.6382	18.5726
18.9905	19.0943	19.1793	19.2481	19.3087	19.3629	19.411	19.449	19.4744	19.481	19.4682	19.4371	19.3938	19.343	19.2927	19.2482	19.2143	19.19	19.1755	19.1696	19.1733	19.1822	19.193	19.2	19.2049	19.2121	19.2264	19.2447	19.2624	19.2715	19.2682	19.2506	19.2235	19.1891	19.1499	19.1057	19.0606	19.0188	18.9857	18.9616	18.9443	18.9274	18.9068	18.8803	18.8501	18.8154	18.7765	18.7292	18.6717	18.6031
18.7574	18.8699	18.9604	19.0311	19.0912	19.1446	19.1889	19.2209	19.2389	19.2386	19.2223	19.1934	19.1561	19.1134	19.0695	19.0281	18.996	18.9754	18.9669	18.9655	18.9686	18.9732	18.9778	18.98	18.9828	18.9879	18.9967	19.0067	19.0166	19.0225	19.0221	19.0134	18.9978	18.975	18.948	18.9181	18.8891	18.8624	18.8403	18.8217	18.8057	18.7894	18.772	18.7507	18.7247	18.6935	18.6586	18.6184	18.5723	18.5172
18.8486	18.957	19.0448	19.1139	19.1707	19.2184	19.2588	19.2884	19.3049	19.3042	19.2858	19.2514	19.208	19.1591	19.1097	19.0635	19.0261	18.9976	18.9786	18.9676	18.9635	18.9621	18.9598	18.9531	18.9442	18.9355	18.931	18.9294	18.927	18.9182	18.9015	18.8752	18.8431	18.8056	18.7652	18.7222	18.6794	18.6392	18.6044	18.5741	18.5483	18.5232	18.4969	18.4666	18.4323	18.393	18.3493	18.2982	18.2383	18.1676
13.6391	13.6855	13.7079	13.7801	13.8736	13.9129	13.9046	13.9029	13.919	13.9392	13.9649	13.987	13.978	13.9405	13.9074	13.8799	13.8255	13.7368	13.6453	13.5888	13.5799	13.5901	13.5822	13.5612	13.547	13.5257	13.484	13.4451	13.4294	13.4317	13.4428	13.4598	13.4809	13.4897	13.4574	13.3928	13.3371	13.2864	13.2094	13.1252	13.0685	13.0427	13.0568	13.1	13.1007	13.0243	12.9409	12.9136	12.9169	12.9056
16.9794	16.9544	16.9644	17.02	17.0563	17.0117	16.9089	16.8409	16.8657	16.9361	16.9582	16.9057	16.8389	16.8058	16.7822	16.747	16.7301	16.7292	16.6923	16.6088	16.5198	16.4592	16.4518	16.5039	16.5538	16.5094	16.3798	16.2852	16.2789	16.2831	16.2587	16.2666	16.3104	16.3021	16.2219	16.1533	16.1395	16.1297	16.085	16.0247	15.9645	15.9164	15.9104	15.9361	15.9349	15.8875	15.8363	15.8202	15.8305	15.8271
11.303	11.4257	11.4844	11.4585	11.4282	11.4845	11.6168	11.718	11.7205	11.6816	11.685	11.7281	11.7644	11.7658	11.7226	11.6504	11.5756	11.5099	11.4755	11.4834	11.4833	11.44	11.4058	11.4225	11.4489	11.4485	11.441	11.4451	11.4587	11.4797	11.4911	11.4794	11.475	11.5006	11.5252	11.5231	11.4979	11.4424	11.3708	11.3407	11.3623	11.3737	11.3491	11.3217	11.3033	11.2824	11.2703	11.2756	11.2771	11.2495
18.2572	18.3301	18.4379	18.5477	18.6075	18.5939	18.538	18.5219	18.5685	18.589	18.5428	18.5158	18.5502	18.5795	18.5628	18.5143	18.4321	18.3162	18.1977	18.1065	18.0565	18.0496	18.0728	18.108	18.1291	18.0925	17.9975	17.9306	17.9476	17.9797	17.9677	17.9602	17.9889	18.0049	17.9735	17.9019	17.7962	17.6767	17.5862	17.5382	17.5019	17.4663	17.459	17.4727	17.4572	17.4056	17.3613	17.3394	17.3111	17.2464
15.2502	15.3225	15.402	15.4985	15.5749	15.6072	15.6155	15.6339	15.6535	15.6379	15.6059	15.6153	15.6567	15.653	15.5757	15.4794	15.3971	15.3012	15.1999	15.1437	15.1256	15.1059	15.0936	15.1019	15.1022	15.0777	15.0575	15.0692	15.0871	15.0687	15.0285	15.0111	15.0188	15.0228	14.9968	14.9313	14.8492	14.7718	14.6893	14.6094	14.5641	14.5568	14.563	14.5542	14.5132	14.4626	14.4288	14.3855	14.3084	14.2311
14.1886	14.2416	14.2891	14.3741	14.4639	14.4979	14.4727	14.4398	14.4531	14.5093	14.5442	14.522	14.4751	14.4396	14.4178	14.3989	14.364	14.2917	14.1899	14.0999	14.0522	14.0417	14.0556	14.0856	14.1068	14.0891	14.0375	13.9975	14.0024	14.0215	14.0133	14.0017	14.0165	14.0261	14.0075	13.9775	13.925	13.8346	13.7493	13.709	13.6871	13.6552	13.6314	13.6249	13.6114	13.5823	13.5499	13.5135	13.4692	13.4238
16.7048	16.7642	16.8166	16.8826	16.9188	16.905	16.8769	16.8677	16.8703	16.8663	16.8551	16.8425	16.8283	16.8081	16.7703	16.7091	16.635	16.5527	16.4555	16.357	16.2907	16.2775	16.3148	16.3709	16.3882	16.3387	16.2685	16.2382	16.2432	16.2437	16.2412	16.2571	16.271	16.2496	16.1987	16.1347	16.0572	15.9744	15.8972	15.819	15.7481	15.7144	15.722	15.742	15.7379	15.6954	15.6464	15.6158	15.5662	15.481
16.3718	16.4318	16.5168	16.6041	16.618	16.5611	16.5055	16.4847	16.4956	16.533	16.5648	16.5545	16.5165	16.4833	16.4462	16.3842	16.306	16.2307	16.1646	16.1045	16.0475	16.0092	16.0084	16.0172	15.99	15.9439	15.9302	15.9427	15.9287	15.8785	15.841	15.8393	15.8356	15.8047	15.7706	15.7428	15.694	15.6168	15.5392	15.4845	15.4532	15.4311	15.401	15.3654	15.3454	15.3405	15.3248	15.288	15.2397	15.183
16.5918	16.6044	16.6548	16.7537	16.8255	16.822	16.7647	16.7145	16.7198	16.7774	16.8339	16.8376	16.7984	16.7562	16.7065	16.6249	16.5318	16.4654	16.4291	16.3942	16.3347	16.2645	16.2326	16.2536	16.2754	16.2492	16.1958	16.1624	16.1498	16.133	16.1138	16.1044	16.1048	16.1134	16.1164	16.0809	15.9963	15.8917	15.8014	15.7393	15.6986	15.6659	15.6426	15.6352	15.6292	15.6115	15.5914	15.5606	15.4916	15.4062
14.0862	14.1267	14.1841	14.2694	14.3382	14.3585	14.3323	14.2987	14.3043	14.3392	14.3673	14.3903	14.4015	14.3695	14.311	14.253	14.1712	14.0812	14.0469	14.0395	13.9813	13.9059	13.8889	13.9087	13.9047	13.8719	13.838	13.8191	13.8069	13.7892	13.7852	13.8148	13.8366	13.7966	13.7305	13.707	13.6981	13.6368	13.5472	13.4903	13.4669	13.4636	13.4763	13.4693	13.4244	13.3817	13.3642	13.3469	13.3106	13.2578
17.3345	17.3472	17.424	17.5431	17.5954	17.5401	17.4661	17.4658	17.5068	17.5045	17.4614	17.4242	17.3847	17.335	17.3082	17.2908	17.2256	17.1196	17.0223	16.9426	16.8799	16.847	16.8289	16.8083	16.8	16.8062	16.8102	16.804	16.7686	16.7076	16.6865	16.727	16.753	16.7284	16.6977	16.6684	16.6053	16.5085	16.4043	16.32	16.2811	16.2753	16.258	16.2227	16.1981	16.182	16.147	16.088	16.0207	15.9606
[truncated: 1,419 more columns]
